# Supplementary material for: Peripheral self-reactivity regulates antigen-specific CD8 T-cell responses and cell division under physiological conditions
Source: PubMed Central journal article supplement (PMC5133449; doi:10.1098/rsob.160293), 2016-11-23
Supplement: rsob160293supp4.pdf [file rsob160293supp4.pdf]

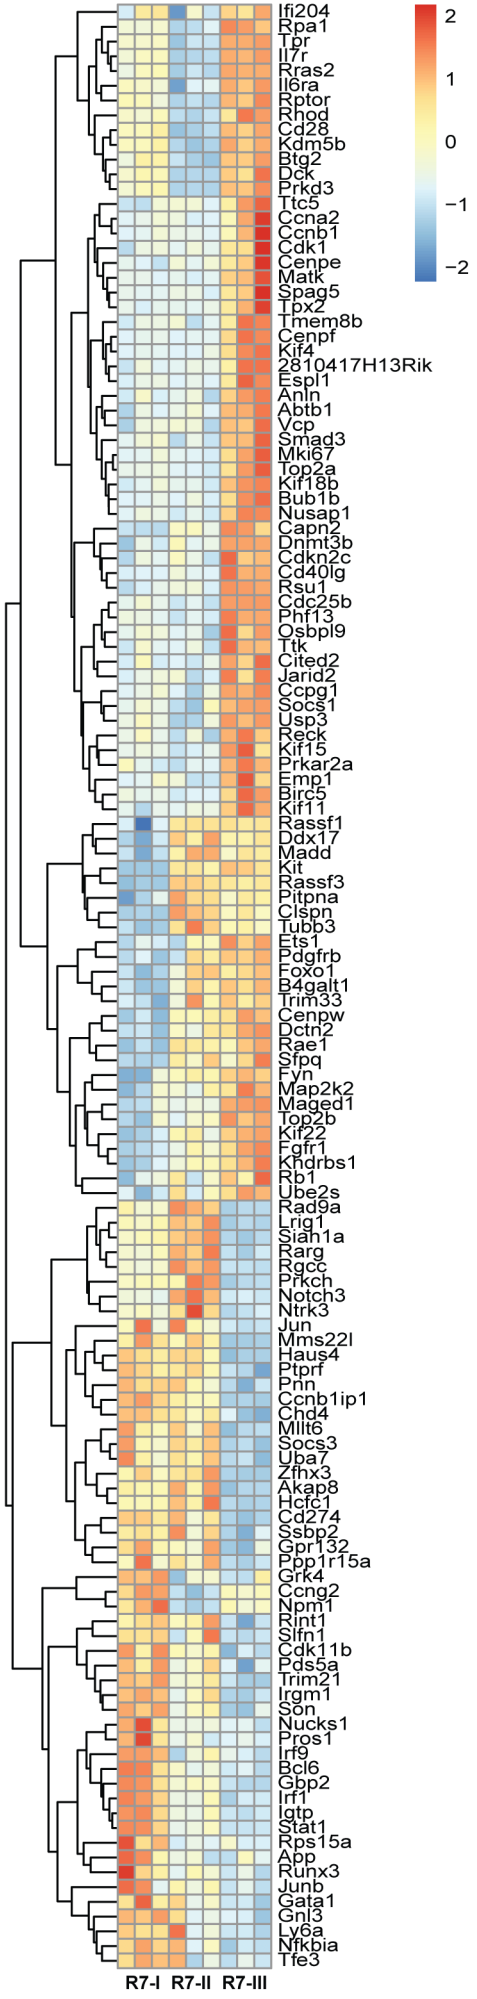

R7-I R7-II R7-III
