# Supplementary material for: Peripheral self-reactivity regulates antigen-specific CD8 T-cell responses and cell division under physiological conditions
Source: PubMed Central journal article supplement (PMC5133449; doi:10.1098/rsob.160293), 2016-11-23
Supplement: rsob160293supp5.pdf [file rsob160293supp5.pdf]

| #  | gene          | fold up | FDR       | #  | gene          | fold down | FDR       |
|----|---------------|---------|-----------|----|---------------|-----------|-----------|
| 1  | Scg5          | 13.80   | 4.41E-234 | 1  | Slc6a19       | -9.64     | 1.43E-222 |
| 2  | Col6a4        | 5.99    | 9.66E-61  | 2  | Abhd14b       | -6.35     | 2.45E-60  |
| 3  | Dapl1         | 5.28    | 5.38E-77  | 3  | Pdk1          | -5.51     | 0         |
| 4  | Mmsgn1        | 4.40    | 3.87E-43  | 4  | Crip1         | -4.63     | 3.98E-52  |
| 5  | Smc6          | 4.33    | 4.51E-258 | 5  | Tmie          | -4.47     | 8.25E-91  |
| 6  | Cpne4         | 4.06    | 1.80E-35  | 6  | Notch3        | -4.04     | 1.46E-44  |
| 7  | Ubash3b       | 3.93    | 3.35E-54  | 7  | Zfp862-ps     | -3.38     | 4.69E-38  |
| 8  | Ptgfrn        | 3.82    | 1.18E-46  | 8  | Cmtm7         | -3.22     | 8.25E-91  |
| 9  | Ptger2        | 3.54    | 5.74E-28  | 9  | Pcsk1         | -3.12     | 3.74E-24  |
| 10 | Pkp4          | 3.47    | 8.17E-68  | 10 | Frmppd1       | -3.12     | 9.33E-23  |
| 11 | Cd163l1       | 3.44    | 1.52E-27  | 11 | Rgcc          | -3.11     | 6.50E-92  |
| 12 | Cd5           | 3.41    | 1.00E-48  | 12 | Als2cl        | -3.05     | 4.10E-119 |
| 13 | Acpp          | 3.37    | 3.82E-111 | 13 | Tdgf1         | -2.94     | 3.75E-23  |
| 14 | Top2a         | 3.37    | 1.21E-26  | 14 | Dok2          | -2.83     | 3.43E-98  |
| 15 | Mki67         | 3.17    | 3.83E-25  | 15 | Atg14         | -2.78     | 3.02E-91  |
| 16 | Itga9         | 3.13    | 3.53E-27  | 16 | Atp6v1d       | -2.77     | 1.54E-22  |
| 17 | Cd101         | 2.92    | 8.48E-28  | 17 | Kcnj16        | -2.75     | 1.56E-18  |
| 18 | A430093F15Rik | 2.91    | 8.76E-21  | 18 | Repin1        | -2.74     | 5.89E-18  |
| 19 | St8sia6       | 2.89    | 6.54E-41  | 19 | Abhd14a       | -2.71     | 1.67E-17  |
| 20 | Slc43a1       | 2.84    | 3.49E-19  | 20 | Pttg1         | -2.70     | 5.42E-20  |
| 21 | Ppp1r3e       | 2.70    | 1.26E-18  | 21 | Gm16907       | -2.69     | 1.38E-17  |
| 22 | Rpgrip1       | 2.67    | 8.17E-26  | 22 | Abca1         | -2.68     | 1.98E-17  |
| 23 | Sall2         | 2.63    | 1.83E-22  | 23 | Gpr114        | -2.64     | 2.32E-21  |
| 24 | Phldb3        | 2.61    | 3.30E-33  | 24 | Prrg4         | -2.57     | 1.04E-16  |
| 25 | Ank           | 2.61    | 7.68E-76  | 25 | Nfam1         | -2.44     | 7.21E-19  |
| 26 | Ccl5          | 2.60    | 4.04E-16  | 26 | Pcbp4         | -2.35     | 2.11E-15  |
| 27 | Itga6         | 2.59    | 1.07E-72  | 27 | Dtx1          | -2.35     | 7.81E-25  |
| 28 | Gch1          | 2.56    | 1.86E-27  | 28 | Gcm1          | -2.34     | 5.35E-13  |
| 29 | Nacc2         | 2.50    | 3.23E-18  | 29 | Sema4f        | -2.33     | 7.18E-29  |
| 30 | Cenpf         | 2.48    | 6.14E-15  | 30 | Samd4         | -2.32     | 8.21E-14  |
| 31 | Cd6           | 2.44    | 1.52E-17  | 31 | Ntrk3         | -2.31     | 1.03E-13  |
| 32 | Rhod          | 2.40    | 7.04E-14  | 32 | Rnf144a       | -2.30     | 1.86E-12  |
| 33 | Lysmd2        | 2.40    | 1.75E-14  | 33 | Reep1         | -2.28     | 1.78E-12  |
| 34 | Fbxl3         | 2.39    | 7.60E-119 | 34 | Itgae         | -2.27     | 1.51E-36  |
| 35 | Camk2b        | 2.38    | 1.60E-13  | 35 | Mns1          | -2.25     | 4.28E-12  |
| 36 | Mfap1a        | 2.36    | 8.69E-52  | 36 | Tln2          | -2.22     | 8.15E-12  |
| 37 | St3gal6       | 2.34    | 2.95E-13  | 37 | Gpr97         | -2.19     | 4.63E-13  |
| 38 | Dap           | 2.33    | 5.96E-89  | 38 | Dstyk         | -2.17     | 7.24E-19  |
| 39 | Il7r          | 2.33    | 1.09E-121 | 39 | Sipa1l2       | -2.15     | 5.13E-11  |
| 40 | Tex9          | 2.31    | 3.25E-23  | 40 | Ly6e          | -2.14     | 1.16E-10  |
| 41 | Pltp          | 2.30    | 5.82E-17  | 41 | Zfhx3         | -2.09     | 1.96E-10  |
| 42 | Ltk           | 2.29    | 8.67E-15  | 42 | C920006O11Rik | -2.08     | 5.69E-10  |
| 43 | Tbc1d4        | 2.28    | 1.28E-53  | 43 | Gsg2          | -2.08     | 1.04E-20  |
| 44 | Nusap1        | 2.26    | 6.92E-12  | 44 | Rgs3          | -2.05     | 2.91E-47  |
| 45 | Bbc3          | 2.26    | 1.66E-35  | 45 | Ksr2          | -2.04     | 2.09E-10  |
| 46 | Runx2         | 2.25    | 3.63E-27  | 46 | D930028M14Rik | -2.03     | 1.24E-14  |
| 47 | Adk           | 2.22    | 8.56E-38  | 47 | Galnt9        | -2.03     | 2.30E-11  |
| 48 | Aspm          | 2.21    | 2.94E-11  | 48 | Lynx1         | -2.02     | 5.19E-09  |
| 49 | Arhgef3       | 2.21    | 7.60E-104 |    |               |           |           |
| 50 | Igf2bp3       | 2.19    | 3.33E-13  |    |               |           |           |
| 51 | Per2          | 2.17    | 7.96E-11  |    |               |           |           |
| 52 | Fam221a       | 2.16    | 4.61E-13  |    |               |           |           |
| 53 | Ybx3          | 2.15    | 1.06E-11  |    |               |           |           |
| 54 | Gm5538        | 2.14    | 1.33E-12  |    |               |           |           |
| 55 | Ccdc88a       | 2.13    | 1.78E-12  |    |               |           |           |
| 56 | Mgat5         | 2.11    | 4.13E-21  |    |               |           |           |
| 57 | Pde5a         | 2.10    | 1.20E-25  |    |               |           |           |
| 58 | Fam219a       | 2.10    | 1.31E-16  |    |               |           |           |
| 59 | Dusp4         | 2.09    | 3.76E-10  |    |               |           |           |
| 60 | Rcn1          | 2.06    | 1.57E-15  |    |               |           |           |
| 61 | Milt4         | 2.05    | 2.73E-20  |    |               |           |           |
| 62 | Xdh           | 2.05    | 2.54E-10  |    |               |           |           |
| 63 | Hip1r         | 2.03    | 1.76E-10  |    |               |           |           |
| 64 | Hs3st3b1      | 2.02    | 1.88E-12  |    |               |           |           |
| 65 | Cdc42ep3      | 2.01    | 2.93E-20  |    |               |           |           |
| 66 | Sidt1         | 2.01    | 2.37E-45  |    |               |           |           |
| 67 | Pear1         | 2.00    | 5.09E-12  |    |               |           |           |
