# Supplementary material for: Peripheral self-reactivity regulates antigen-specific CD8 T-cell responses and cell division under physiological conditions
Source: PubMed Central journal article supplement (PMC5133449; doi:10.1098/rsob.160293), 2016-11-23
Supplement: rsob160293supp6.pdf [file rsob160293supp6.pdf]

| #  | Biological Processes                                  | in data/total | FDR      |
|----|-------------------------------------------------------|---------------|----------|
| 1  | Cell cycle_Mitosis                                    | 48/179        | 5.01E-07 |
| 2  | Cell adhesion_Leucocyte chemotaxis                    | 48/205        | 1.95E-05 |
| 3  | Cell cycle_G2-M                                       | 48/206        | 1.95E-05 |
| 4  | Cytoskeleton_Regulation of cytoskeleton rearrangement | 43/183        | 4.71E-05 |
| 5  | Cell adhesion_Integrin-mediated cell-matrix adhesion  | 45/214        | 4.17E-04 |
| 6  | Cell cycle_Core                                       | 29/115        | 4.17E-04 |
| 7  | Development_Hemopoiesis, Erythropoietin pathway       | 32/136        | 6.06E-04 |
| 8  | Immune response_TCR signaling                         | 37/174        | 1.37E-03 |
| 9  | Proliferation_Lymphocyte proliferation                | 42/209        | 1.60E-03 |
| 10 | Immune response_Phagosome in antigen presentation     | 46/243        | 2.76E-03 |
| 11 | Signal Transduction_Cholecystokinin signaling         | 25/106        | 2.76E-03 |
| 12 | Cell adhesion_Integrin priming                        | 25/110        | 4.47E-03 |
| 13 | Cell cycle_G1-S Growth factor regulation              | 38/195        | 4.47E-03 |
| 14 | Cell cycle_S phase                                    | 31/149        | 4.47E-03 |
| 15 | Cell adhesion_Platelet aggregation                    | 32/158        | 5.58E-03 |
| 16 | Cytoskeleton_Spindle microtubules                     | 24/109        | 7.42E-03 |
| 17 | Cell cycle_Meiosis                                    | 23/106        | 1.08E-02 |
| 18 | Proliferation_Positive regulation cell proliferation  | 40/221        | 1.08E-02 |
| 19 | Signal transduction_NOTCH signaling                   | 42/236        | 1.10E-02 |
| 20 | Development_Neurogenesis_Axonal guidance              | 41/230        | 1.15E-02 |
| 21 | Cell adhesion_Attractive and repulsive receptors      | 33/175        | 1.17E-02 |
| 22 | Apoptosis_Apoptotic mitochondria                      | 18/77         | 1.17E-02 |
